# Supplementary material for: Construction of crossed heterojunctions from p-ZnTe and n-CdSe nanoribbons and their photoresponse properties
Source: Royal Society of Chemistry journal article supplement (doi:10.1039/c4tc01034e), 2014-06-12
Supplement: c4tc01034e1.pdf [file c4tc01034e1.pdf]

Supplementary Information for

**Construction of crossed heterojunction from p-ZnTe and n-CdSe  
nanoribbons and their photoresponse properties**

Di Wu, Yang Jiang,\* Xudong Yao, Yajing Chang, Yugang Zhang, Yongqiang Yu,

Zhifeng Zhu, Yan Zhang, Xinzheng Lan and Honghai Zhong

School of Materials Science and Engineering, Hefei University of Technology, Hefei,

Anhui 230009, People's Republic of China.

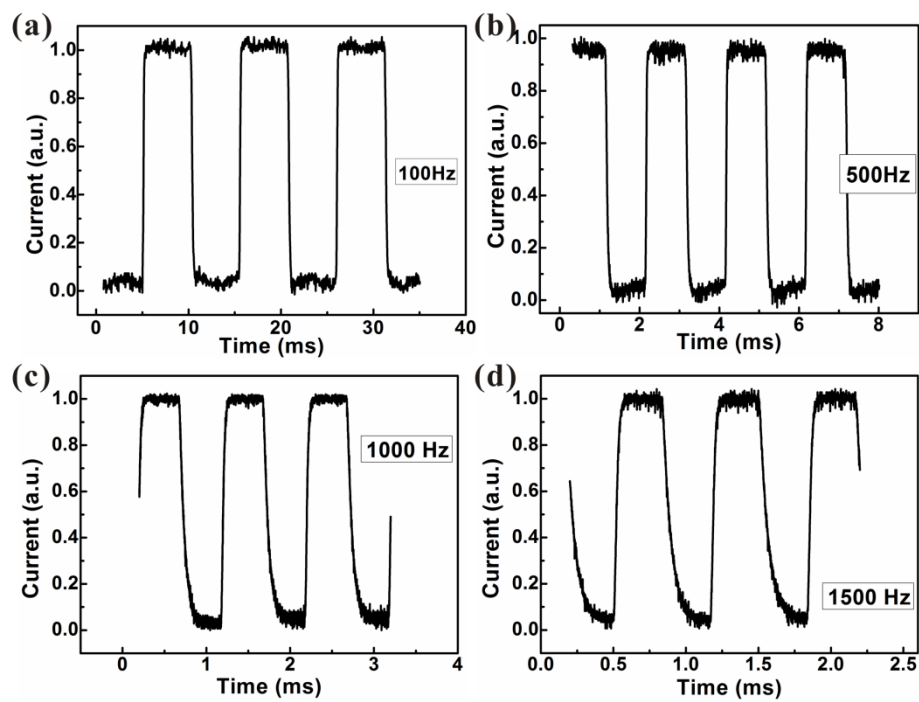

**Fig. S1** Photoresponse characteristics of the HD device for pulsed light irradiation at frequencies of (a) 100 Hz, (b) 500 Hz, (c) 1000 Hz and (d) 1500 Hz.

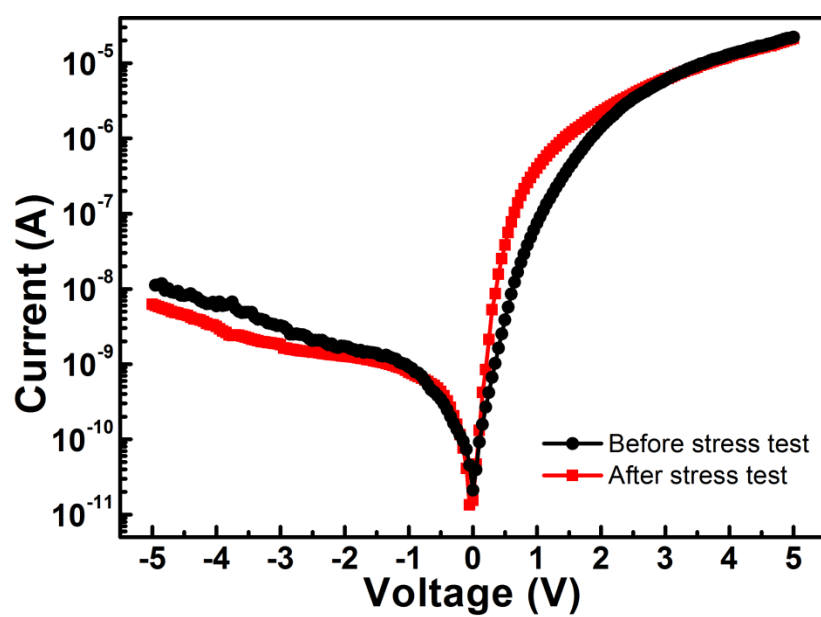

**Fig. S2** I-V curves of the HD device measured before and after stress test.
